# Supplementary material for: Biochemical characterization of the feedforward loop between CDK1 and FOXM1 in epidermal stem cells
Source: PubMed Central journal article supplement — Biol Direct. 2024 Oct 13;19:91. doi: 10.1186/s13062-024-00540-8 (PMC11472434; doi:10.1186/s13062-024-00540-8), 2024-10-13

# **Supplementary data, uncropped blots**

## **Biochemical characterization of the feedforward loop between CDK1 and FOXM1 in epidermal stem cells**

Maria Pia Polito<sup>1,3</sup>, Alessio Romaldini<sup>1,3</sup>, Lorenzo Tagliazucchi<sup>2</sup>, Grazia Marini<sup>1</sup>,  
Federica Radice<sup>1</sup>, Gaia Andrea Gozza<sup>1</sup>, Giulia Bergamini<sup>1</sup>, Maria Paola Costi<sup>2</sup>, Elena  
Enzo<sup>1\*</sup>

Figura 2b

CDK1

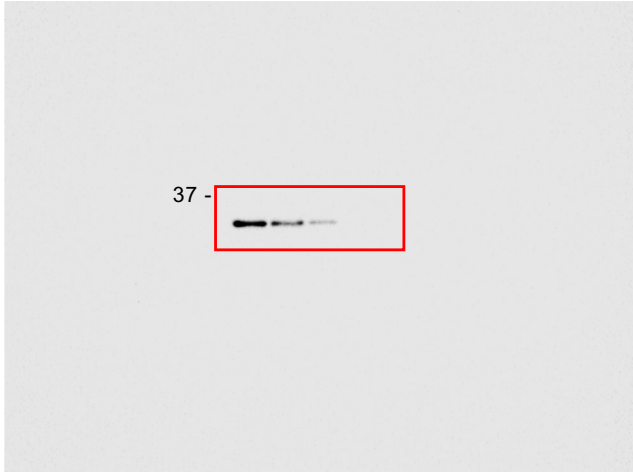

CDK1/GAPDH

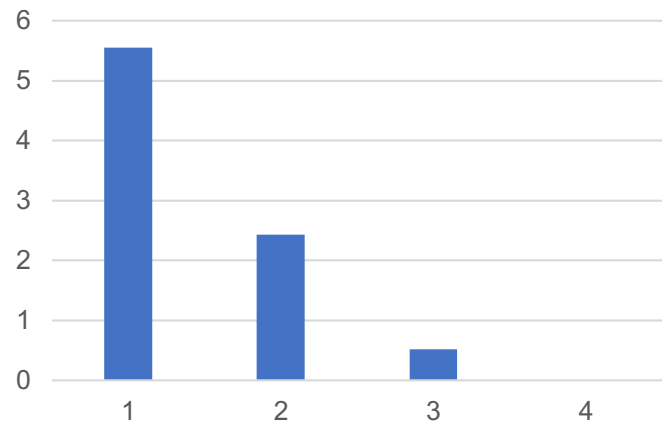

SURV

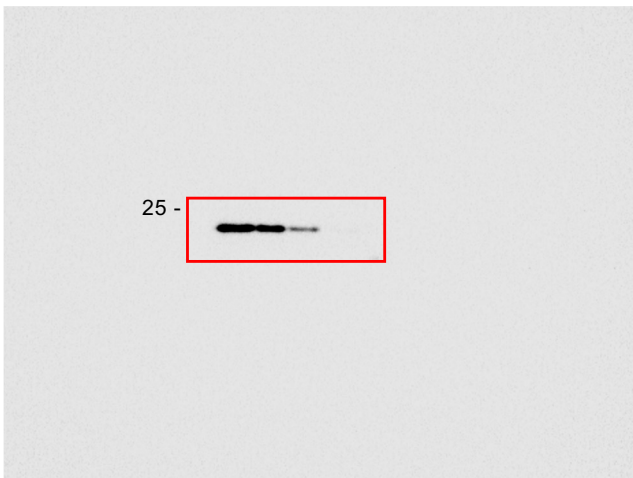

SURV/GAPDH

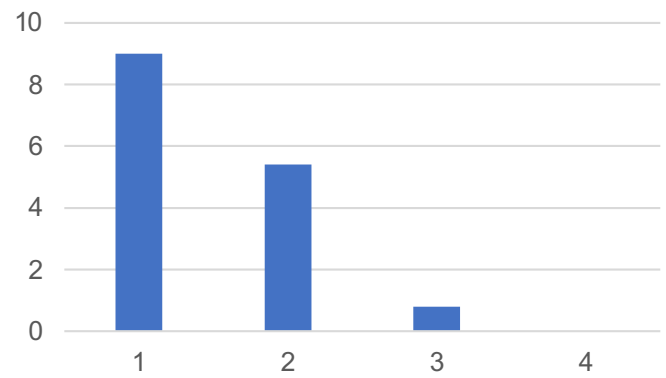

GAPDH

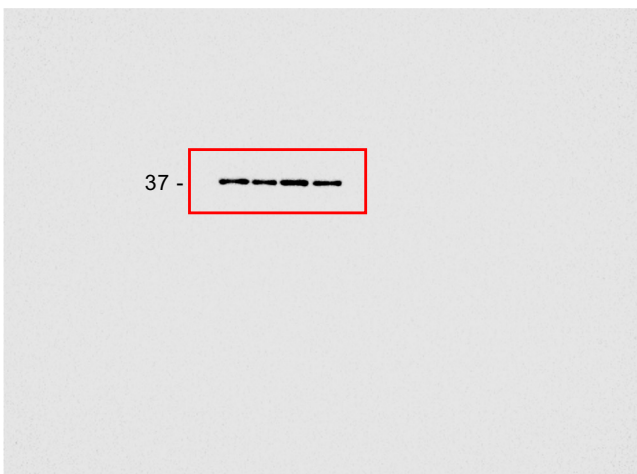

Figure 2d, c

FOXM1

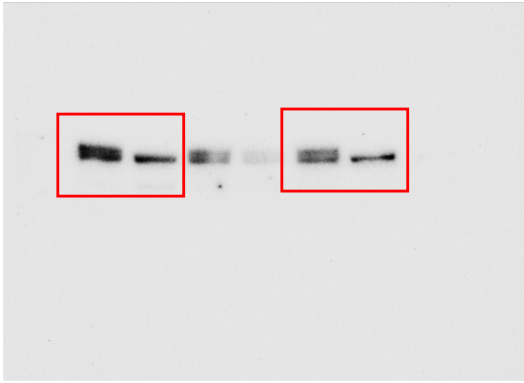

FOXM1/GAPDH

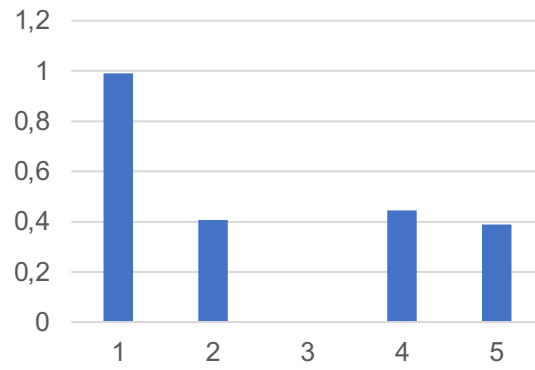

CDK1

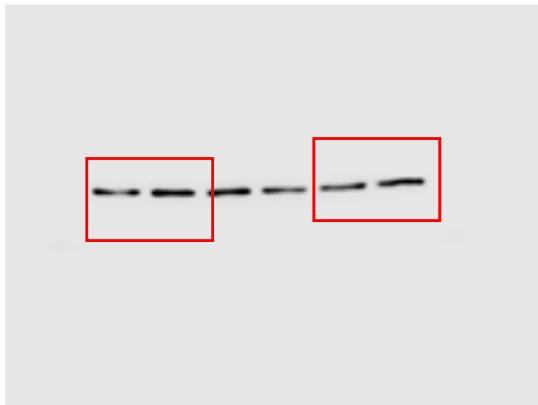

CDK1/GAPDH

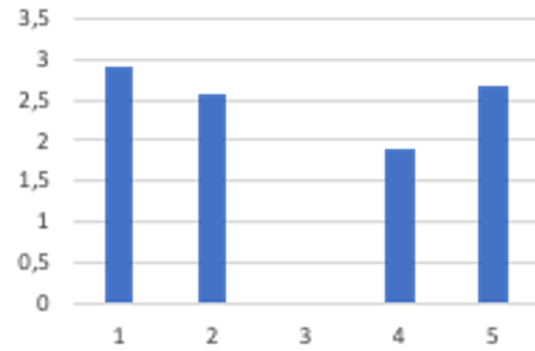

GAPDH

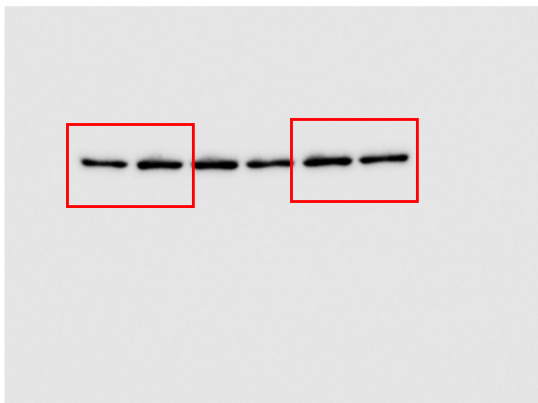

Figure 3c

FOXM1

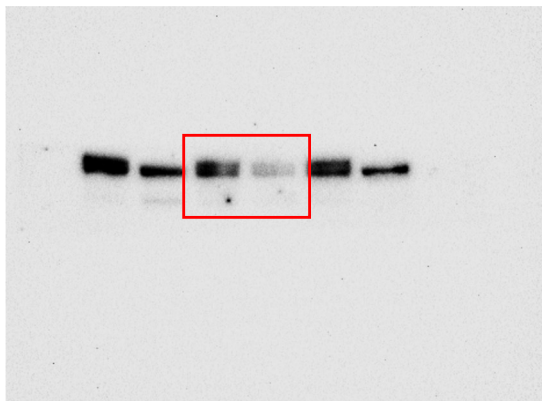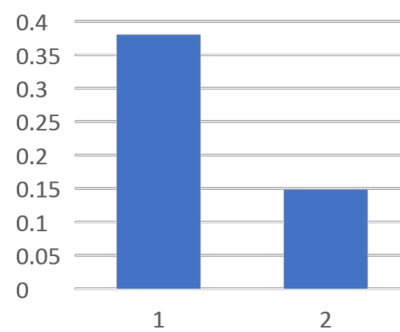

GAPDH

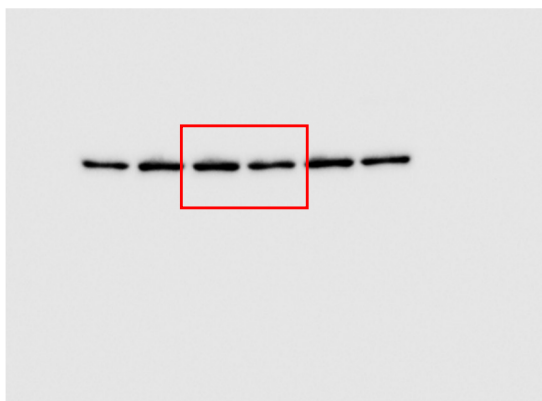

Figure 4a

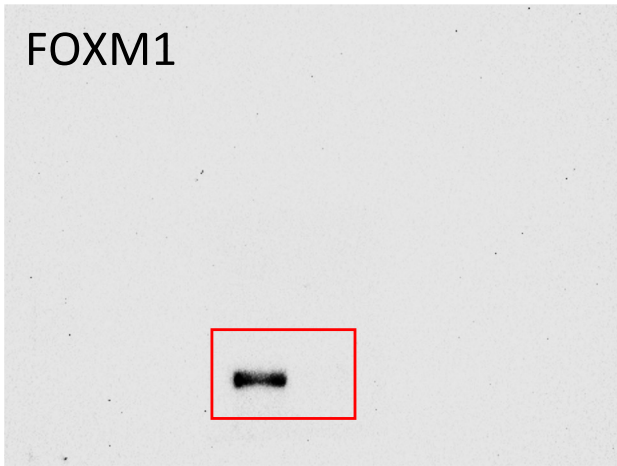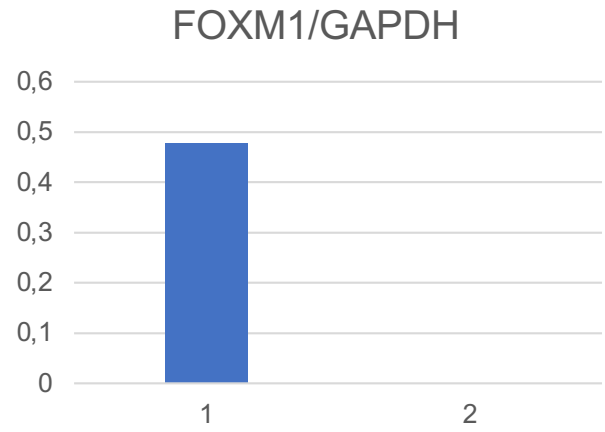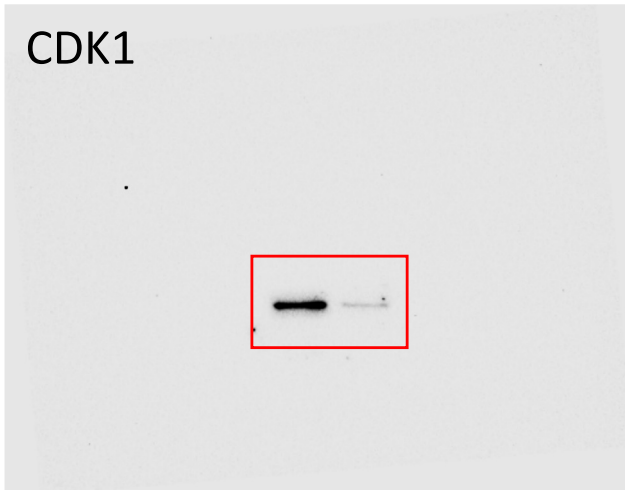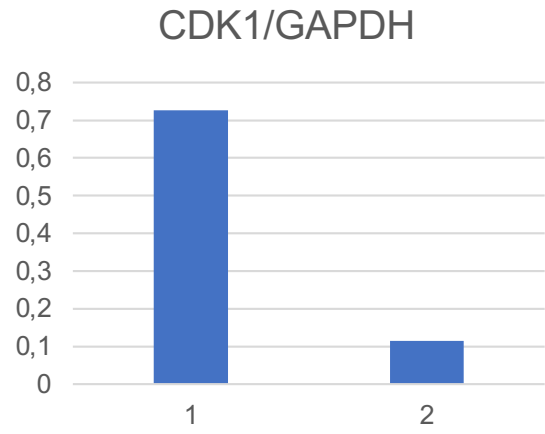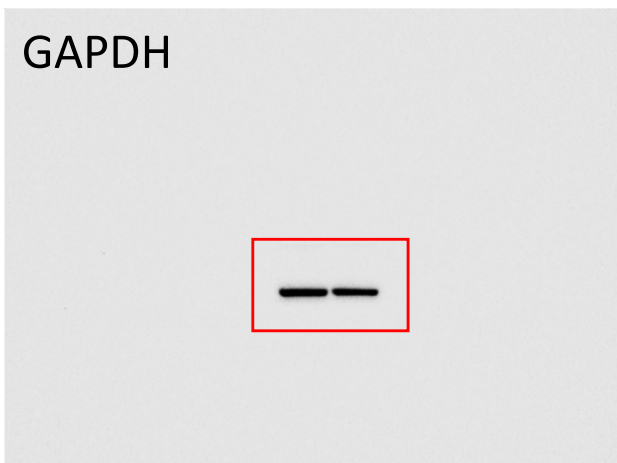

Figure 4c

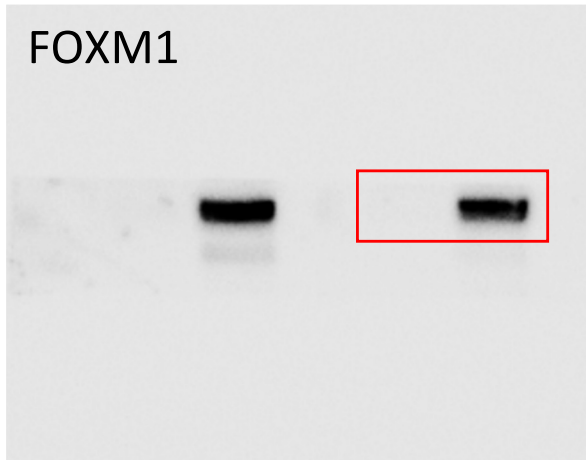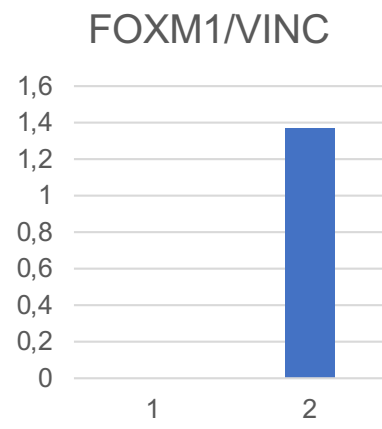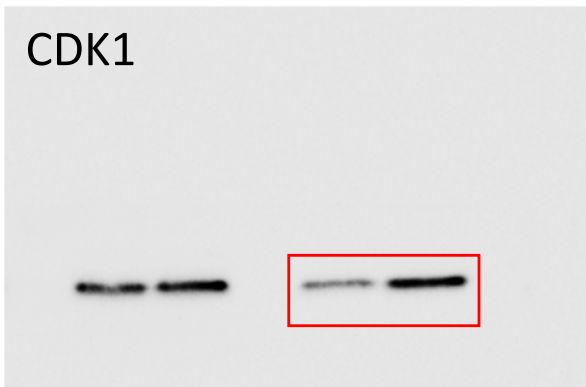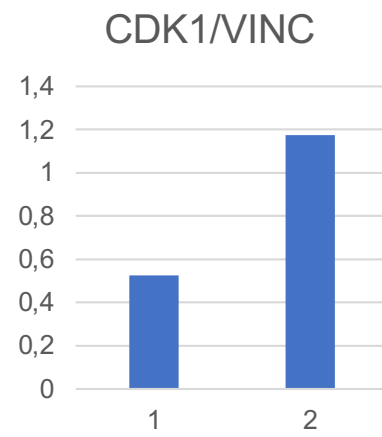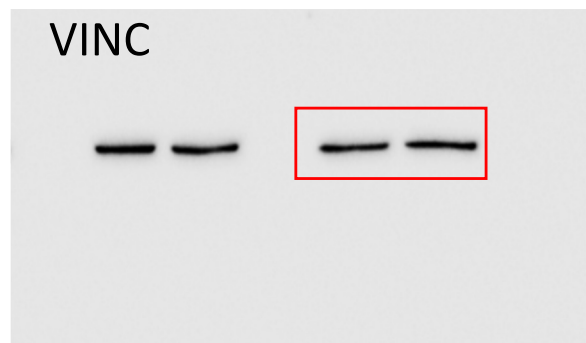

Figure 4e

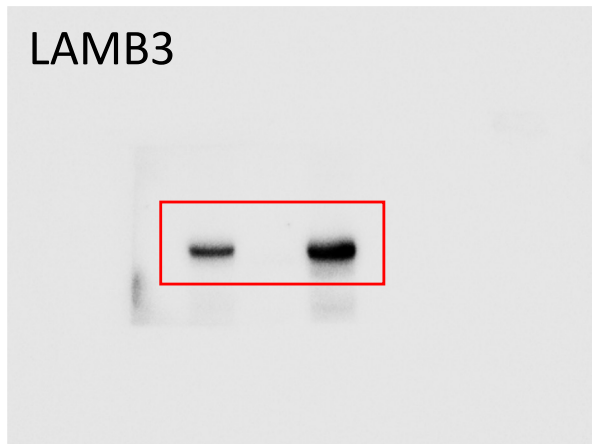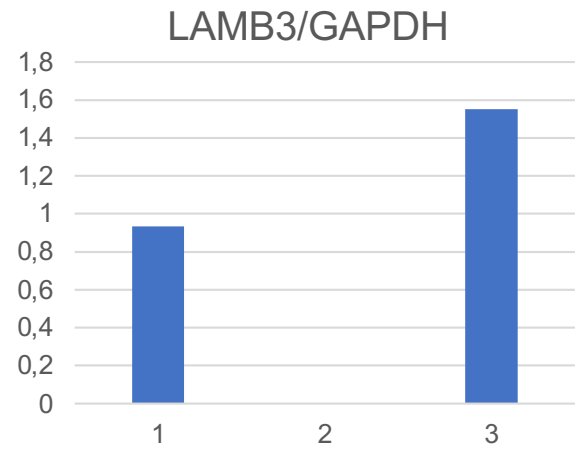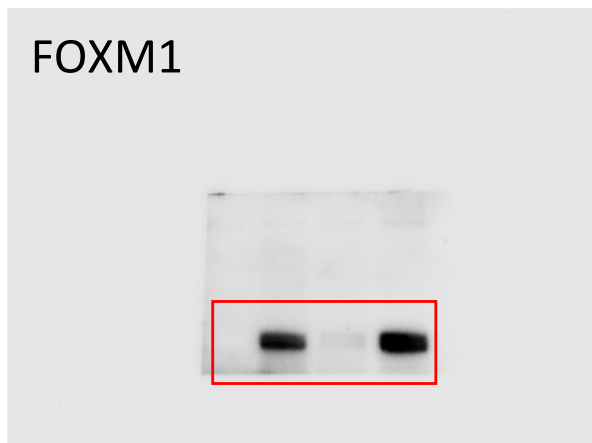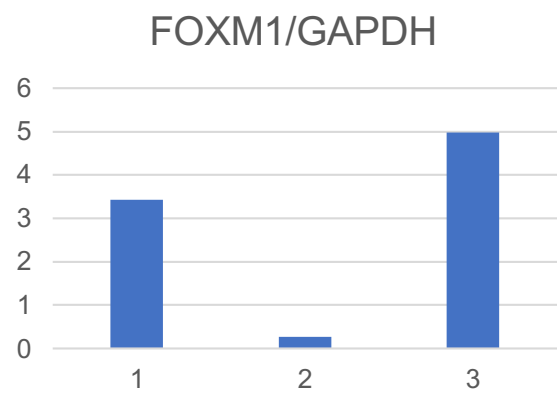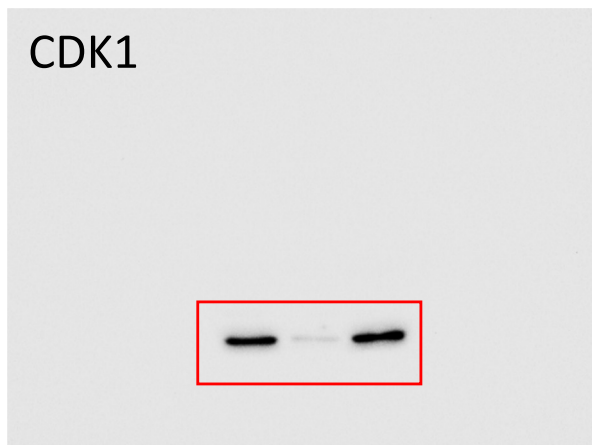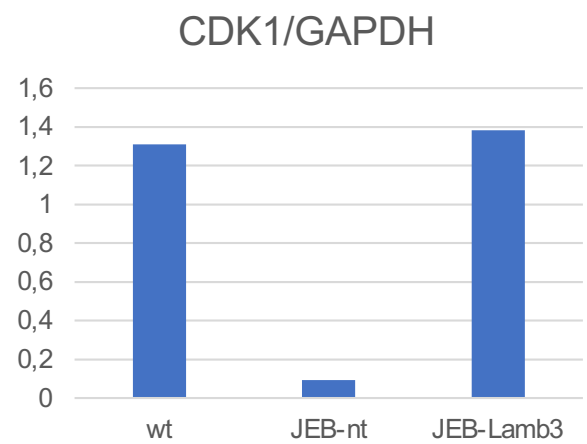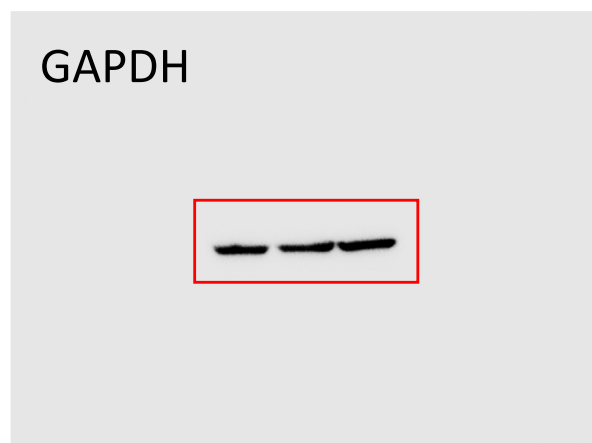

Figure 4f

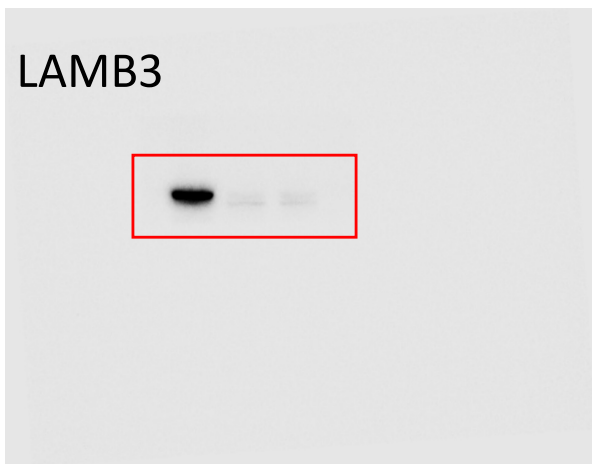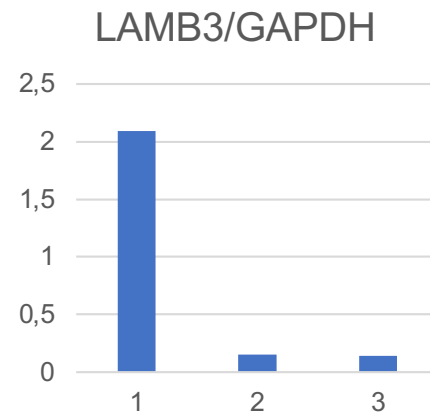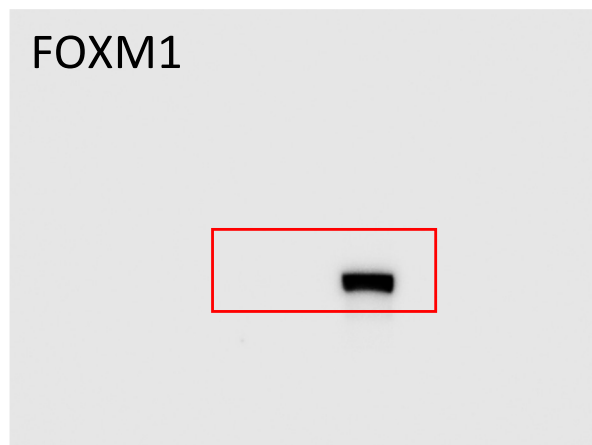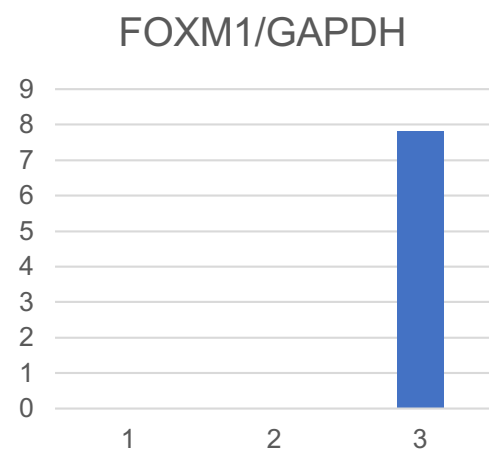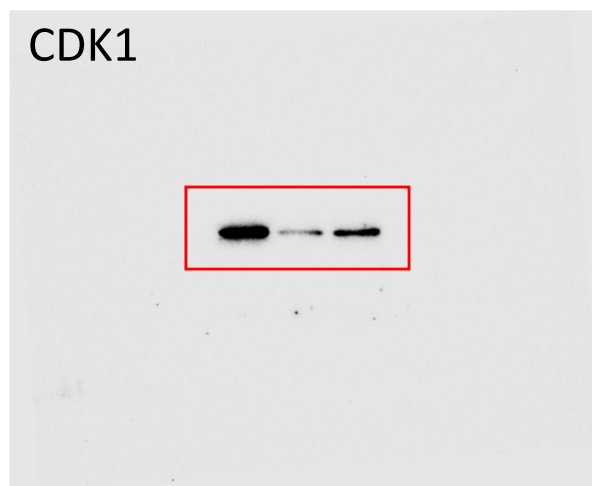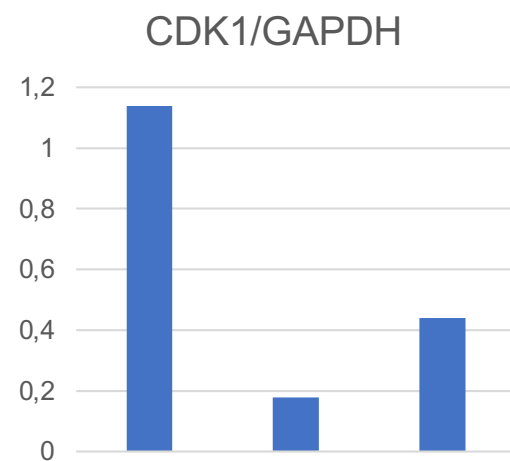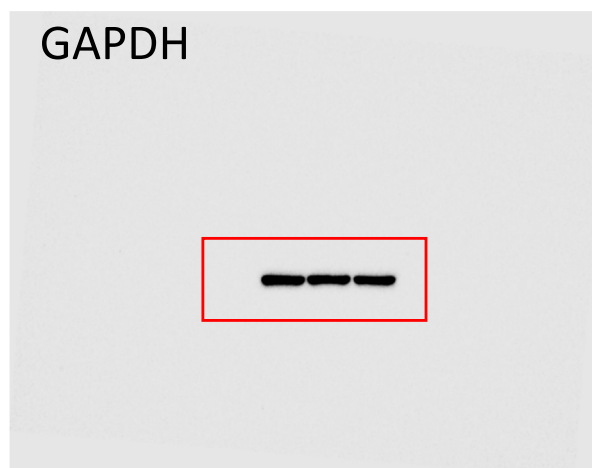



Figure 5g

CDK1

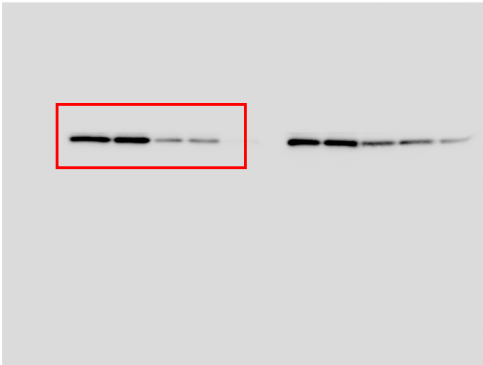

CDK1/VINC

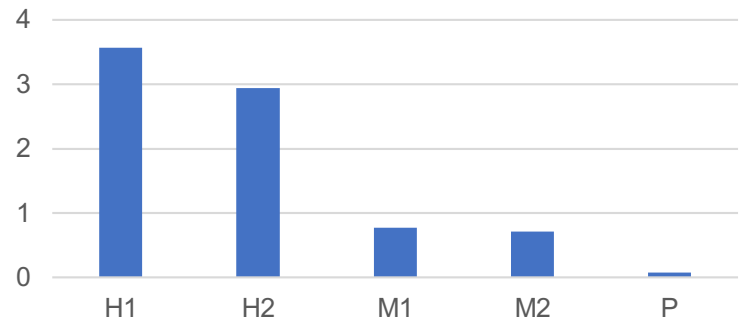

FOXM1

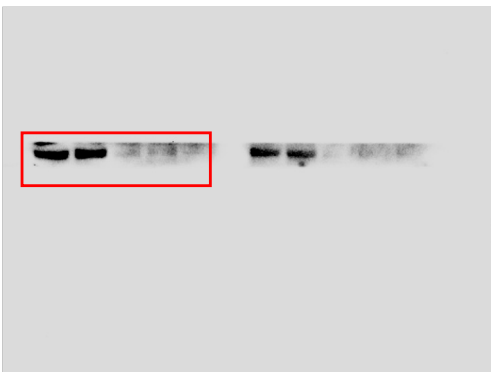

FOXM1/VINC

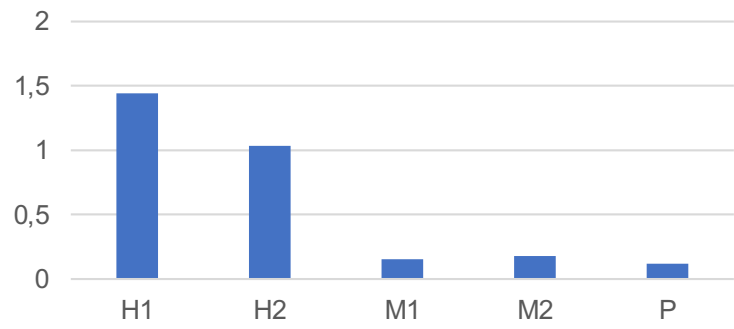

P63

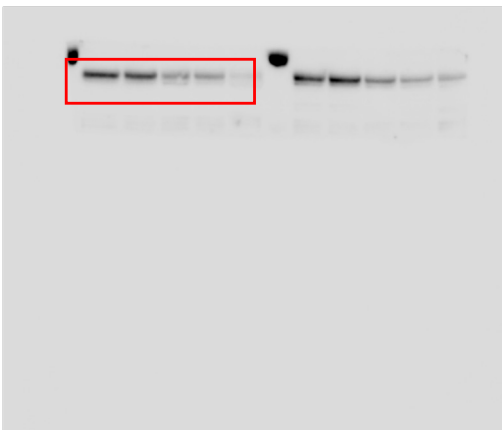

P63/VINC

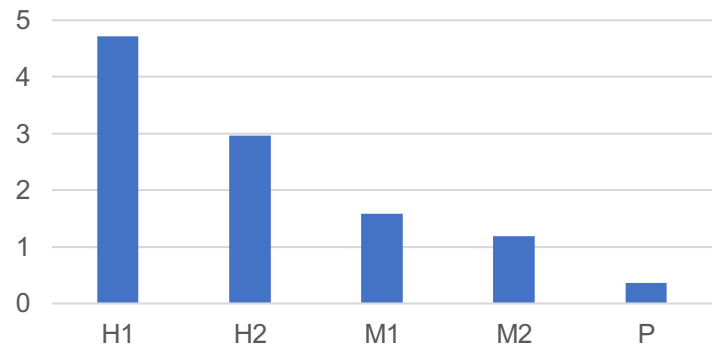

VINC

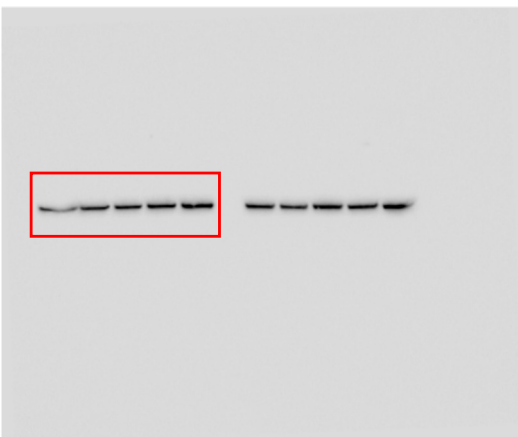

# Supplementary Figure 2d

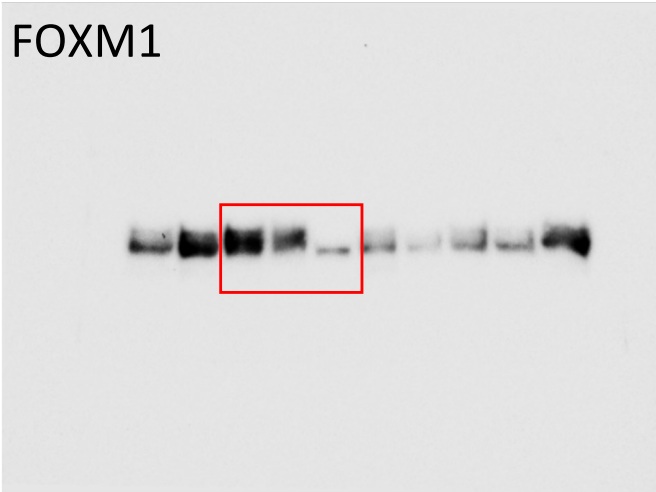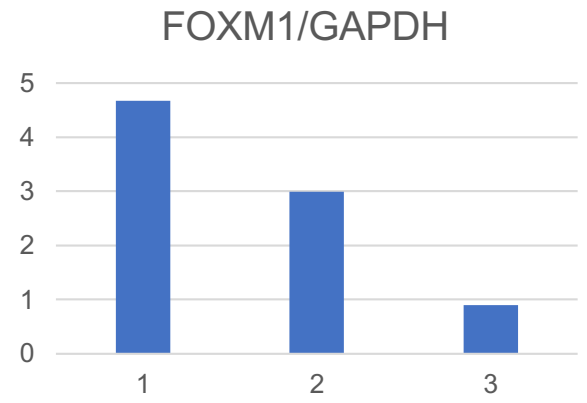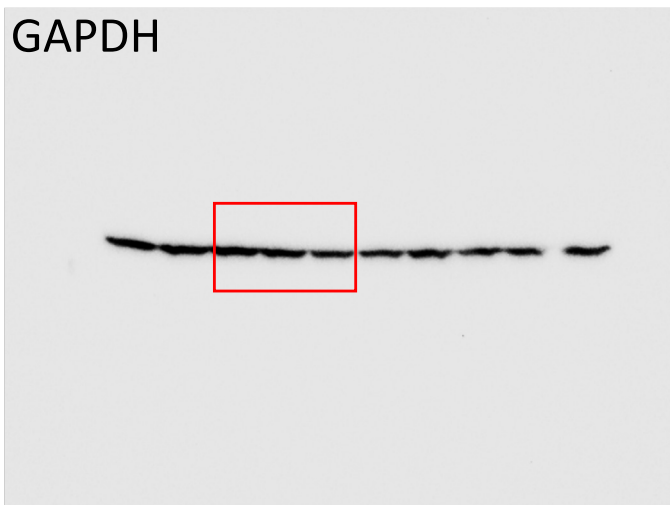

Supplement: 13062_2024_540_MOESM2_ESM.pdf [file 13062_2024_540_MOESM2_ESM.pdf]
